# Supplementary material for: Opening Minds Stigma Scale for Health Care Providers (OMS-HC): Examination of psychometric properties and responsiveness
Source: PubMed Central journal article supplement (PMC4024210; doi:10.1186/1471-244x-14-120), 2014-04-23
Supplement: 1471-244X-14-120-S4.pdf [file 1471-244X-14-120-S4.pdf]

**Additional file 4:****OMS-HC Total and Subscale Means by Group Characteristics, mean (SD)**

| <b>Variable</b>                                                         | <b>n</b>    | <b>Attitude</b>   | <b>Disclosure/<br/>Help-seeking</b> | <b>Social<br/>Distance</b> | <b>20-item<br/>total</b> | <b>12-item<br/>total</b> | <b>15-item<br/>total</b> |
|-------------------------------------------------------------------------|-------------|-------------------|-------------------------------------|----------------------------|--------------------------|--------------------------|--------------------------|
| <b>Overall</b>                                                          | <b>1523</b> | <b>12.6 (3.3)</b> | <b>11.2 (2.9)</b>                   | <b>9.6 (2.5)</b>           | <b>46.8 (7.8)</b>        | <b>30.2 (5.8)</b>        | <b>33.4 (6.8)</b>        |
| <b>Professional group</b>                                               |             |                   |                                     |                            |                          |                          |                          |
| Practicing MD                                                           | 666         | 12.7 (3.4)        | 11.2 (3.0)                          | 9.8 (2.6)                  | 47.0 (8.0)               | 30.4 (5.9)               | 33.6 (6.9)               |
| Medical student                                                         | 188         | 12.7 (3.1)        | 11.9 (2.8)                          | 9.7 (2.2)                  | 47.6 (7.4)               | 31.0 (5.5)               | 34.2 (6.2)               |
| Nurse                                                                   | 252         | 13.1 (3.4)        | 11.1 (2.8)                          | 9.4 (2.6)                  | 45.7 (7.9)               | 31.2 (5.3)               | 33.7 (6.6)               |
| Social worker                                                           | 45          | 10.7 (2.6)        | 9.9 (2.9)                           | 9.1 (2.0)                  | 42.5 (7.5)               | 27.0 (5.0)               | 29.8 (6.1)               |
| Psychologist                                                            | 24          | 10.6 (2.8)        | 10.3 (2.4)                          | 9.8 (2.4)                  | 43.7 (6.4)               | 27.0 (4.6)               | 30.7 (5.6)               |
| Allied Health                                                           | 214         | 12.2 (3.0)        | 11.6 (2.9)                          | 9.5 (2.4)                  | 46.2 (7.9)               | 30.0 (5.5)               | 33.3 (6.7)               |
| <b>Medical Association</b>                                              |             |                   |                                     |                            |                          |                          |                          |
| Psychiatrist                                                            | 79          | 10.4 (3.3)        | 10.5 (3.2)                          | 9.4 (2.3)                  | 43.7 (8.4)               | 27.8 (5.9)               | 30.3 (6.9)               |
| Family                                                                  | 106         | 12.3 (3.2)        | 11.5 (3.3)                          | 9.2 (2.5)                  | 46.1 (8.0)               | 30.3 (6.1)               | 33.0 (6.9)               |
| Rural Physician                                                         | 129         | 12.6 (3.2)        | 10.8 (3.0)                          | 9.8 (2.3)                  | 46.8 (7.2)               | 30.3 (5.6)               | 33.2 (6.4)               |
| Emergency Rural Physician                                               | 92          | 13.6 (3.4)        | 11.7 (3.1)                          | 10.3 (2.7)                 | 49.4 (8.2)               | 32.1 (5.9)               | 35.6 (6.9)               |
| Anesthetist                                                             | 29          | 14.5 (3.2)        | 12.5 (2.1)                          | 10.3 (2.5)                 | 52.2 (6.3)               | 34.4 (4.0)               | 37.7 (5.4)               |
| Surgeon                                                                 | 36          | 14.9 (2.9)        | 12.0 (2.4)                          | 11.0 (2.2)                 | 52.4 (6.6)               | 33.9 (4.7)               | 38.0 (5.6)               |
| <b>Age</b>                                                              |             |                   |                                     |                            |                          |                          |                          |
| 18-29                                                                   | 417         | 12.5 (3.3)        | 11.3 (2.9)                          | 9.7 (2.6)                  | 46.2 (8.0)               | 29.9 (5.8)               | 33.5 (6.8)               |
| 30-39                                                                   | 170         | 12.6 (3.5)        | 10.4 (2.8)                          | 9.3 (2.8)                  | 44.6 (8.4)               | 28.9(5.7)                | 32.2 (7.0)               |
| 40-49                                                                   | 139         | 12.6 (3.3)        | 11.0 (2.8)                          | 9.5 (2.5)                  | 45.3 (7.7)               | 29.5 (5.8)               | 33.1 (6.6)               |
| 50-59                                                                   | 109         | 12.3 (3.5)        | 11.1 (2.9)                          | 9.4 (2.4)                  | 45.3 (7.7)               | 29.6 (5.3)               | 32.9 (6.6)               |
| over 60                                                                 | 17          | 11.6 (3.1)        | 10.6 (3.0)                          | 9.8 (1.8)                  | 44.1 (8.1)               | 29.0 (6.3)               | 32.0 (6.7)               |
| 18-25                                                                   | 111         | 12.9 (3.0)        | 12.4 (2.8)                          | 9.4 (2.2)                  | 48.4 (7.2)               | 32.0 (5.2)               | 34.7 (6.3)               |
| 26-44                                                                   | 64          | 12.2 (3.2)        | 11.5 (2.6)                          | 9.0 (2.4)                  | 45.5 (7.2)               | 29.9 (5.4)               | 32.6 (6.2)               |
| <b>Do you know a close friend or family member with mental illness?</b> |             |                   |                                     |                            |                          |                          |                          |
| Yes                                                                     | 1126        | 12.3 (3.4)        | 11.0 (3.0)                          | 9.3 (2.5)                  | 45.7 (8.0)               | 29.8 (5.9)               | 32.7 (6.8)               |
| No                                                                      | 255         | 13.5 (3.2)        | 11.9 (2.8)                          | 10.6 (2.5)                 | 49.2 (7.4)               | 31.8 (5.3)               | 35.9 (6.3)               |
| <b>Have you ever been treated for a mental illness?</b>                 |             |                   |                                     |                            |                          |                          |                          |
| Yes                                                                     | 250         | 11.7 (3.3)        | 10.0 (3.0)                          | 8.6 (2.2)                  | 42.9 (7.6)               | 27.9 (5.7)               | 30.3 (6.4)               |
| No                                                                      | 1056        | 12.8 (3.3)        | 11.4 (2.9)                          | 9.8 (2.5)                  | 47.1 (7.8)               | 30.6 (5.7)               | 34.0 (6.6)               |
| <b>Have you ever treated a person with a mental illness?</b>            |             |                   |                                     |                            |                          |                          |                          |
| Yes                                                                     | 385         | 12.2 (3.4)        | 10.9 (2.9)                          | 9.3 (2.5)                  | 47.6 (7.6)               | 30.4 (5.7)               | 32.4 (6.4)               |
| No                                                                      | 257         | 13.0 (3.3)        | 11.3 (2.9)                          | 10.0 (2.5)                 | 45.4 (7.5)               | 29.4 (5.7)               | 34.3 (6.5)               |
| <b>Gender</b>                                                           |             |                   |                                     |                            |                          |                          |                          |
| Male                                                                    | 228         | 12.8 (3.3)        | 11.5 (2.8)                          | 9.6 (2.5)                  | 46.6 (7.8)               | 30.6 (5.5)               | 33.9 (6.5)               |
| Female                                                                  | 801         | 12.4 (3.3)        | 11.1 (2.9)                          | 9.5 (2.6)                  | 45.7 (8.0)               | 29.7 (5.7)               | 33.0 (6.7)               |

<sup>1</sup> Disclosure same on both surveys, Attitude has 6 items on 15-item version revised and 7 items on original 12-item version.
