# Supplementary material for: Opening Minds Stigma Scale for Health Care Providers (OMS-HC): Examination of psychometric properties and responsiveness
Source: BMC Psychiatry. 2014 Apr 23;14:120. doi: 10.1186/1471-244X-14-120 (PMC4024210; doi:10.1186/1471-244X-14-120)
Supplement: Additional file 5 — Characteristics of respondents that completed only pre-test and both surveys. [file 1471-244X-14-120-S5.pdf]

**Additional file 5:****Characteristics of respondents that completed only pre-test and both surveys**

|                                | Completed only<br>pre-test, n (%) | Completed both pre- and<br>post-test, n (%) | Response rate<br>(%) |
|--------------------------------|-----------------------------------|---------------------------------------------|----------------------|
| Age                            | n=970                             | n=807                                       |                      |
| 18-29                          | 403 (41.6)                        | 340 (42.1)                                  | 84.4                 |
| 30-39                          | 153 (15.8)                        | 122 (15.1)                                  | 79.7                 |
| 40-49                          | 122 (12.6)                        | 92 (11.4)                                   | 75.4                 |
| 50-59                          | 100 (10.3)                        | 77 (9.5)                                    | 77.0                 |
| over 60                        | 17 (1.8)                          | 13 (1.6)                                    | 76.5                 |
| 18-25                          | 111 (11.4)                        | 102 (12.6)                                  | 91.9                 |
| 26-44                          | 64 (6.6)                          | 61 (7.6)                                    | 95.3                 |
| Gender                         | n=970                             | n=813                                       |                      |
| Male                           | 219 (22.6)                        | 182 (22.4)                                  | 83.1                 |
| Female                         | 751 (77.4)                        | 631 (77.6)                                  | 84.0                 |
| Professional group             | n=1,411                           | n=795                                       |                      |
| Physician (practicing MD)      | 645 (45.7)                        | 175 (22.0)                                  | 27.1                 |
| Medical student                | 182 (12.9)                        | 170 (21.4)                                  | 93.4                 |
| Nurse/ nurse student           | 238 (16.9)                        | 180 (22.6)                                  | 75.6                 |
| Social worker                  | 41 (2.9)                          | 39 (4.9)                                    | 95.1                 |
| Psychologist                   | 24 (1.7)                          | 24 (3.0)                                    | 100.0                |
| Allied (OT/ Pharmacy students) | 202 (14.3)                        | 159 (20.0)                                  | 78.7                 |
| Non-Medical                    | 5 (0.4)                           | 5 (0.6)                                     | 100.0                |
| Other                          | 74 (5.2)                          | 43 (5.4)                                    | 58.1                 |

\*Overall response rate to the 15-item OMS-HC post-test survey was 56.7% (821/1449). Sample sizes above correspond to the available sociodemographic characteristics for the item.
